# Supplementary material for: Reciprocal regulation of microRNA and mRNA profiles in neuronal development and synapse formation
Source: PubMed Central journal article supplement (PMC2759968; doi:10.1186/1471-2164-10-419), 2009-09-08
Supplement: 1471-2164-10-419-S4.pdf [file 1471-2164-10-419-S4.pdf]

**mmu-let-7a**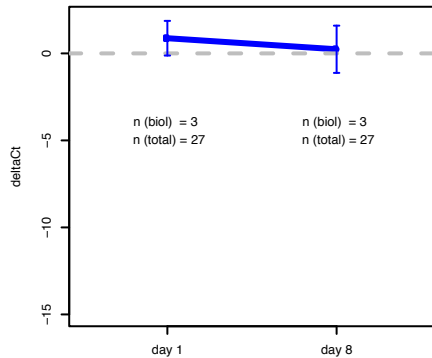**(A)****mmu-miR-143**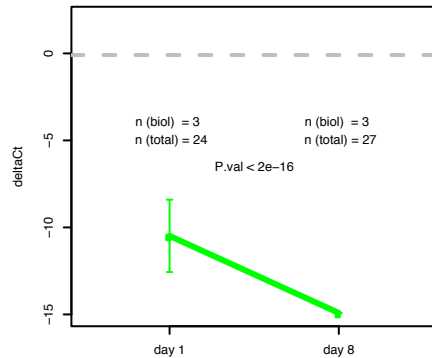**(B)****mmu-miR-370**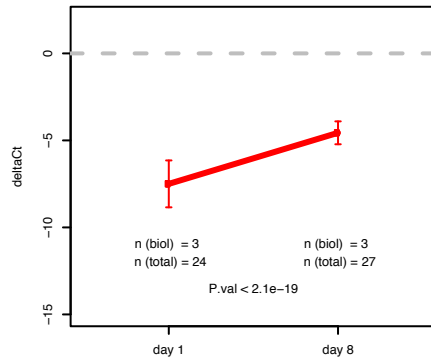**(C)**
