# Supplementary material for: Reciprocal regulation of microRNA and mRNA profiles in neuronal development and synapse formation
Source: PubMed Central journal article supplement (PMC2759968; doi:10.1186/1471-2164-10-419), 2009-09-08

p-value < 0.001

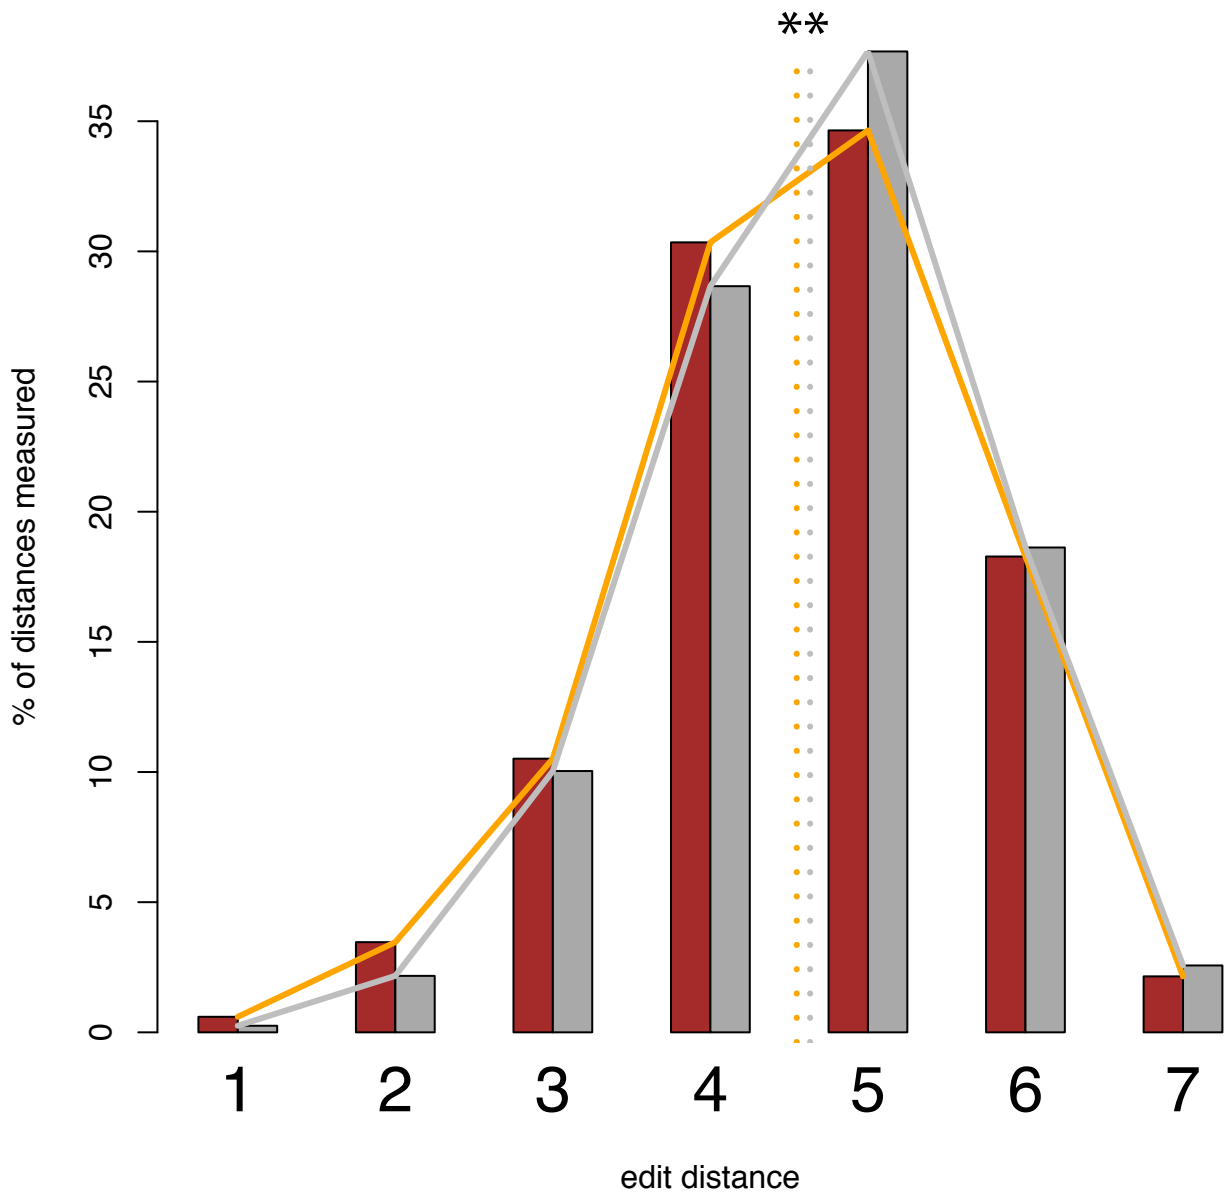

Supplement: 1471-2164-10-419-S7.pdf [file 1471-2164-10-419-S7.pdf]
