# Supplementary material for: Reciprocal regulation of microRNA and mRNA profiles in neuronal development and synapse formation
Source: PubMed Central journal article supplement (PMC2759968; doi:10.1186/1471-2164-10-419), 2009-09-08

## Targets of Down-Regulated miRNAs

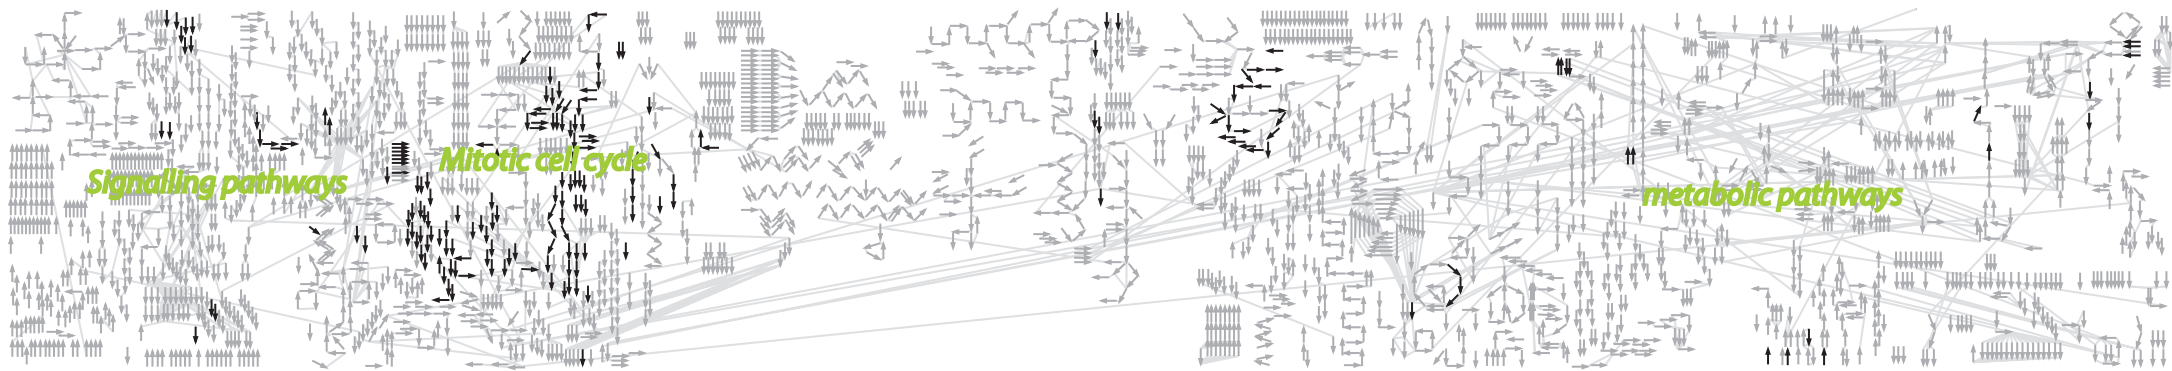

## Targets of Up-Regulated miRNAs

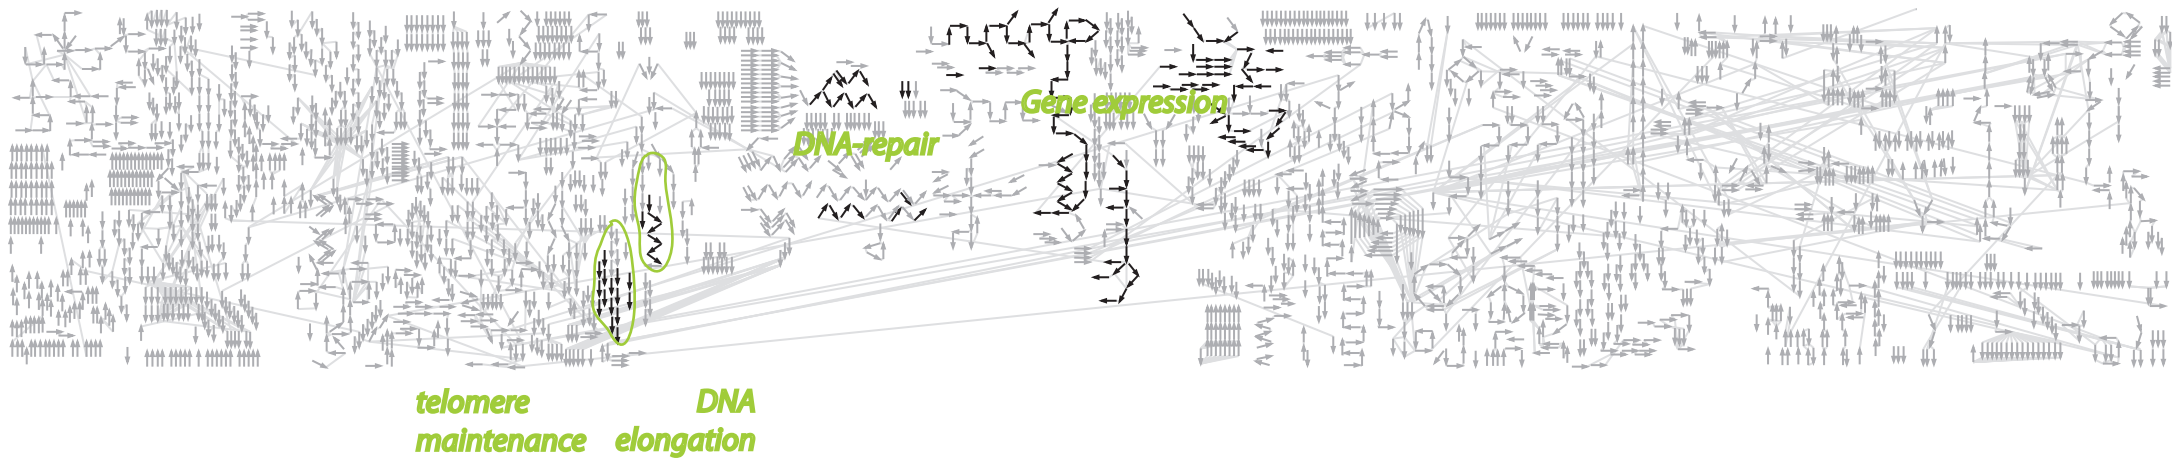

Supplement: 1471-2164-10-419-S11.pdf [file 1471-2164-10-419-S11.pdf]
